# Supplementary material for: Computational Insights into Excited State Intramolecular Double Proton Transfer Behavior Associated with Atomic Electronegativity for Bis(2′-benzothiazolyl)hydroquinone
Source: MDPI journal article supplement (doi:10.3390/molecules28165951), 2023-08-08
Supplement: s1 [file s1]

# Computational Insights into Excited State Intramolecular Double Proton Transfer Behavior Associated with Atomic Electronegativity for Bis(2'-benzothiazolyl)hydroquinone

Jinfeng Zhao \* and Chang Liu

College of Physical Science and Technology, Shenyang Normal University,  
Shenyang 110034, China; lc20021210202307@163.com

\* Correspondence: jfzhao1990112@163.com or jfzhao1990112@synu.edu.cn

**Table S1.** Experimental and calculated maximum absorption peaks (nm) of BBTHQ in hexane solvent by TDDFT method with different functionals at TZVP basis set.

| PBE0   | B3LYP  | Cam-B3LYP | M062X  | mPW1PW91 | ωB97XD | Exp. <sup>25</sup> |
|--------|--------|-----------|--------|----------|--------|--------------------|
| 431.63 | 446.18 | 393.55    | 384.85 | 432.04   | 390.42 | 440                |

**Table S2.** Parameters of bond lengths (Å) and bong angles ( $\Delta^\circ$ ) involved in dual hydrogen bonds for BBTHQ-SO-PT1, BBTHQ-SO-PT2 and BBTHQ-SO-DPT forms in  $S_0$  and  $S_1$  states.

|                                          | BBTHQ-SO-PT1 |         | BBTHQ-SO-PT2 |         | BBTHQ-SO-DPT |         |
|------------------------------------------|--------------|---------|--------------|---------|--------------|---------|
|                                          | $S_0$        | $S_1$   | $S_0$        | $S_1$   | $S_0$        | $S_1$   |
| O <sub>1</sub> -H <sub>2</sub>           | 1.63181      | 1.91396 | 0.98488      | 1.00906 | 0.98488      | 1.90354 |
| H <sub>2</sub> -N <sub>3</sub>           | 1.05899      | 1.02367 | 1.80813      | 1.68592 | 1.80813      | 1.02336 |
| O <sub>4</sub> -H <sub>5</sub>           | 0.98515      | 1.02502 | 0.98870      | 1.76383 | 0.98870      | 1.75253 |
| H <sub>5</sub> -N <sub>6</sub>           | 1.76087      | 1.60397 | 1.75141      | 1.03633 | 1.75141      | 1.03655 |
| $\Delta(\text{O}_1\text{H}_2\text{N}_3)$ | 136.94       | 126.07  | 145.17       | 148.21  | 145.17       | 126.57  |
| $\Delta(\text{O}_4\text{H}_5\text{N}_6)$ | 146.32       | 150.26  | 146.04       | 134.72  | 146.04       | 135.26  |

**Table S3.** Parameters of bond lengths (Å) and bong angles ( $\Delta^\circ$ ) involved in dual hydrogen bonds for BBTHQ-SS-PT and BBTHQ-SS-DPT forms in  $S_0$  and  $S_1$  states.

|                                          | BBTHQ-SS-PT |         | BBTHQ-SS-DPT |         |
|------------------------------------------|-------------|---------|--------------|---------|
|                                          | $S_0$       | $S_1$   | $S_0$        | $S_1$   |
| O <sub>1</sub> -H <sub>2</sub>           | 0.98858     | 1.77857 | 0.98858      | 1.77076 |
| H <sub>2</sub> -N <sub>3</sub>           | 1.75430     | 1.03418 | 1.75430      | 1.03377 |
| O <sub>4</sub> -H <sub>5</sub>           | 0.98858     | 1.02303 | 0.98858      | 1.77076 |
| H <sub>5</sub> -N <sub>6</sub>           | 1.75430     | 1.61164 | 1.75430      | 1.03377 |
| $\Delta(\text{O}_1\text{H}_2\text{N}_3)$ | 146.01      | 134.05  | 146.01       | 134.47  |
| $\Delta(\text{O}_4\text{H}_5\text{N}_6)$ | 146.01      | 149.88  | 146.01       | 134.47  |

**Table S4.** Parameters of bond lengths (Å) and bong angles ( $\Delta^\circ$ ) involved in dual hydrogen bonds for BBTHQ-SSe-PT1, BBTHQ-SSe-PT2 and BBTHQ-SSe-DPT forms in  $S_0$  and  $S_1$  states.

|                                          | BBTHQ-SSe-PT1 |         | BBTHQ-SSe-PT2 |         | BBTHQ-SSe-DPT |         |
|------------------------------------------|---------------|---------|---------------|---------|---------------|---------|
|                                          | $S_0$         | $S_1$   | $S_0$         | $S_1$   | $S_0$         | $S_1$   |
| O <sub>1</sub> -H <sub>2</sub>           | 0.98914       | 1.75856 | 0.98914       | 1.02572 | 0.98914       | 1.75423 |
| H <sub>2</sub> -N <sub>3</sub>           | 1.74982       | 1.03660 | 1.74982       | 1.60242 | 1.74982       | 1.03609 |
| O <sub>4</sub> -H <sub>5</sub>           | 0.98865       | 1.02229 | 0.98865       | 1.77947 | 0.98865       | 1.77173 |
| H <sub>5</sub> -N <sub>6</sub>           | 1.75384       | 1.61403 | 1.75384       | 1.03409 | 1.75384       | 1.03383 |
| $\Delta(\text{O}_1\text{H}_2\text{N}_3)$ | 146.14        | 135.66  | 146.14        | 150.19  | 146.14        | 135.97  |
| $\Delta(\text{O}_4\text{H}_5\text{N}_6)$ | 146.01        | 149.79  | 146.01        | 134.00  | 146.01        | 134.48  |

**Table S5.** Vertical excitation energies ( $\lambda$  nm), oscillator strength ( $f$ ), transition compositions and percentages for BBTHQ-SO, BBTHQ-SS and BBTHQ-Se compounds in hexane solvent.

|          | <b>Transition</b>     | <b><math>\lambda</math></b> | <b><math>f</math></b> | <b>Composition</b>  | <b>CI (%)</b> |
|----------|-----------------------|-----------------------------|-----------------------|---------------------|---------------|
| BBTHQ-SO | $S_0 \rightarrow S_1$ | 433.30                      | 0.646                 | H $\rightarrow$ L   | 98.77         |
|          | $S_0 \rightarrow S_2$ | 346.17                      | 0.881                 | H-1 $\rightarrow$ L | 96.27         |
|          | $S_0 \rightarrow S_3$ | 320.77                      | 0.098                 | H-2 $\rightarrow$ L | 94.20         |
| BBTHQ-SS | $S_0 \rightarrow S_1$ | 446.18                      | 0.641                 | H $\rightarrow$ L   | 98.85         |
|          | $S_0 \rightarrow S_2$ | 354.17                      | 0.836                 | H-1 $\rightarrow$ L | 96.58         |
|          | $S_0 \rightarrow S_3$ | 325.01                      | 0.001                 | H-2 $\rightarrow$ L | 94.89         |
| BBTHQ-Se | $S_0 \rightarrow S_1$ | 450.46                      | 0.649                 | H $\rightarrow$ L   | 98.88         |
|          | $S_0 \rightarrow S_2$ | 361.28                      | 0.594                 | H-1 $\rightarrow$ L | 96.04         |
|          | $S_0 \rightarrow S_3$ | 339.45                      | 0.027                 | H-2 $\rightarrow$ L | 94.08         |

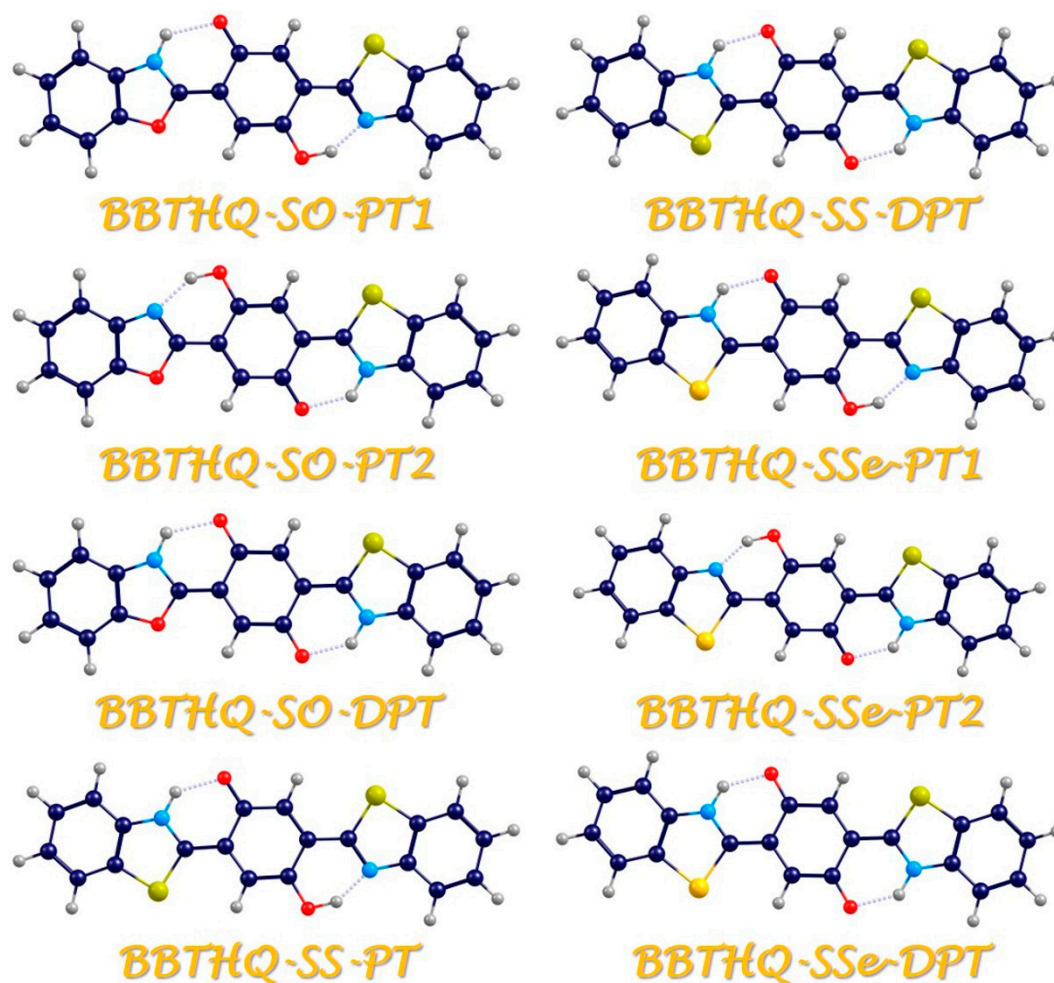

**Figure S1.** View of the proton-transfer configurations. BBTHQ-SO-PT1: single proton-transfer BBTHQ-SO along with  $O_1-H_2 \cdots N_3$ ; BBTHQ-SO-PT2: single proton-transfer BBTHQ-SO along with  $O_4-H_5 \cdots N_6$ ; BBTHQ-SO-DPT: double proton-transfer BBTHQ-SO along with  $O_1-H_2 \cdots N_3$  &  $O_4-H_5 \cdots N_6$ ; BBTHQ-SS-PT: single proton-transfer BBTHQ-SS along with  $O_1-H_2 \cdots N_3$  or  $O_4-H_5 \cdots N_6$ ; BBTHQ-SS-DPT: double proton-transfer BBTHQ-SS along with  $O_1-H_2 \cdots N_3$  &  $O_4-H_5 \cdots N_6$ ; BBTHQ-SSe-PT1: single proton-transfer BBTHQ-SSe along with  $O_1-H_2 \cdots N_3$ ; BBTHQ-SSe-PT2: single proton-transfer BBTHQ-SSe along with  $O_4-H_5 \cdots N_6$ ; BBTHQ-SSe-DPT: double proton-transfer BBTHQ-SSe along with  $O_1-H_2 \cdots N_3$  &  $O_4-H_5 \cdots N_6$ .

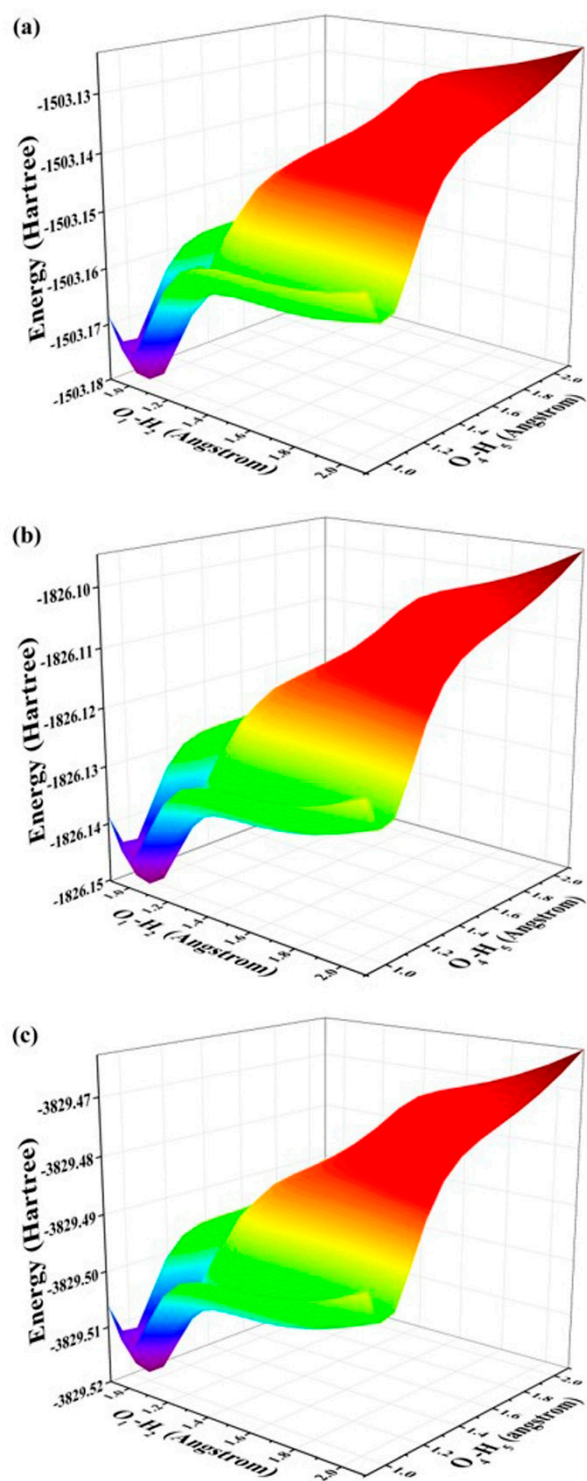

**Figure S2.** The constructed  $S_0$ -state PES for BBTHQ-SO (a), BBTHQ-SS (b) and BBTHQ-SSe (c).
